# Supplementary material for: Biological Self-Healing of Cement Paste and Mortar by Non-Ureolytic Bacteria Encapsulated in Alginate Hydrogel Capsules
Source: MDPI journal article supplement (doi:10.3390/ma13173711), 2020-08-22
Supplement: s1 [file s1]

Supplementary information

# Biological Self-Healing of Cement Paste and Mortar by Non-Ureolytic Bacteria Encapsulated in Alginate Hydrogel Capsules

Mohammad Fahimizadeh <sup>1</sup>, Ayesha Diane Abeyratne <sup>1</sup>, Lee Sui Mae <sup>2</sup>, R. K. Raman Singh <sup>3</sup> and Pooria Pasbakhsh <sup>1,\*</sup>

<sup>1</sup> School of Engineering, Monash University Malaysia, Bandar Sunway 47500, Malaysia; Mohammad.Fahimizadeh@monash.edu (M.F.); ayeshaabeyratne@gmail.com (A.D.A.)

<sup>2</sup> School of Science, Monash University Malaysia, Bandar Sunway 47500, Malaysia; lee.sui.mae@monash.edu

<sup>3</sup> Department of Chemical Engineering, Department of Mechanical and Aerospace Engineering, Monash University, Clayton 3168, Australia; raman.singh@monash.edu

\* Correspondence: pooria.pasbakhsh@monash.edu

Received: 24 June 2020; Accepted: 20 July 2020; Published: date

## S1. Calculation of theoretical capsule viability for NS1 capsules

Average viability of 3 spore suspensions used for preparation of biological replicate capsules was determined to be  $3.36 \times 10^7$  cells/mL for S and NS1 capsules, and  $3.16 \times 10^{10}$  cells/mL for NS2 capsules. 0.25 mL of spore suspension was added to 9.75 mL of sodium alginate solution.

Viability of the encapsulation solution:  $C_1V_1=C_2V_2$

S and NS1:  $(3.36 \times 10^7) \times 0.25 = C_2 \times 10$ ;  $C_2 = (3.36 \times 10^7) \times 0.025 = 8.40 \times 10^5$  cells/mL

NS2:  $(3.16 \times 10^{10}) \times 0.25 = C_2 \times 10$ ;  $C_2 = (7.88 \times 10^8) \times 0.025 = 7.88 \times 10^8$  cells/mL

Average number of capsules obtained from 10 mL of encapsulation solution was 114 capsules. Hence, each capsule is made from  $10/114 = 0.088$  mL of encapsulation solution.

5 capsules were dissolved in 5 mL of citrate-EDTA buffer. Hence, the theoretical viability of spores in a single capsule is:  $C_1V_1=C_2V_2$

S and NS1:  $(8.40 \times 10^5) \times (5 \times 0.088) = C_2 \times 5$ ;  $C_2 = (8.40 \times 10^5) \times 0.088 = 7.39 \times 10^4$  cells/mL

NS2:  $(7.88 \times 10^8) \times (5 \times 0.088) = C_2 \times 5$ ;  $C_2 = (1.97 \times 10^7) \times 0.088 = 6.93 \times 10^7$  cells/mL

Standard deviation of this theoretical value was calculated based on the standard deviation of the viability of the 3 spore suspensions, which was  $2.44 \times 10^7$  cells/mL

$(2.44 \times 10^7) \times 0.025 \times 0.088 = 5.3 \times 10^4$

## → Univariate Analysis of Variance

### Between-Subjects Factors

|      |      | Value Label | N |
|------|------|-------------|---|
| Type | 1.00 | NS1         | 3 |
|      | 2.00 | S           | 3 |
|      | 3.00 | Theoretical | 3 |

### Tests of Between-Subjects Effects

Dependent Variable: Viability

| Source          | Type III Sum of Squares | df | Mean Square | F      | Sig. |
|-----------------|-------------------------|----|-------------|--------|------|
| Corrected Model | 190058756 <sup>a</sup>  | 2  | 95029377.78 | .051   | .950 |
| Intercept       | 5.517E+10               | 1  | 5.517E+10   | 29.813 | .002 |
| Type            | 190058755.6             | 2  | 95029377.78 | .051   | .950 |
| Error           | 1.110E+10               | 6  | 1850708267  |        |      |
| Total           | 6.647E+10               | 9  |             |        |      |
| Corrected Total | 1.129E+10               | 8  |             |        |      |

a. R Squared = .017 (Adjusted R Squared = -.311)

### Post Hoc Tests

#### Type

#### Multiple Comparisons

Dependent Variable: Viability

Tukey HSD

| (I) Type    | (J) Type    | Mean Difference (I-J) | Std. Error  | Sig. | 95% Confidence Interval |             |
|-------------|-------------|-----------------------|-------------|------|-------------------------|-------------|
|             |             |                       |             |      | Lower Bound             | Upper Bound |
| NS1         | S           | -8433.3333            | 35125.56777 | .969 | -116208.2210            | 99341.5544  |
|             | Theoretical | 2240.0000             | 35125.56777 | .998 | -105534.8877            | 110014.8877 |
| S           | NS1         | 8433.3333             | 35125.56777 | .969 | -99341.5544             | 116208.2210 |
|             | Theoretical | 10673.3333            | 35125.56777 | .951 | -97101.5544             | 118448.2210 |
| Theoretical | NS1         | -2240.0000            | 35125.56777 | .998 | -110014.8877            | 105534.8877 |
|             | S           | -10673.3333           | 35125.56777 | .951 | -118448.2210            | 97101.5544  |

Based on observed means.

The error term is Mean Square(Error) = 1850708266.667.

**Figure S1.** Results of statistical analysis: one-way ANOVA on viability of S and NS1 capsules and the theoretical capsule viability calculated in S1. Significance in difference indicates significantly different spore viability ( $P < 0.05$ ).

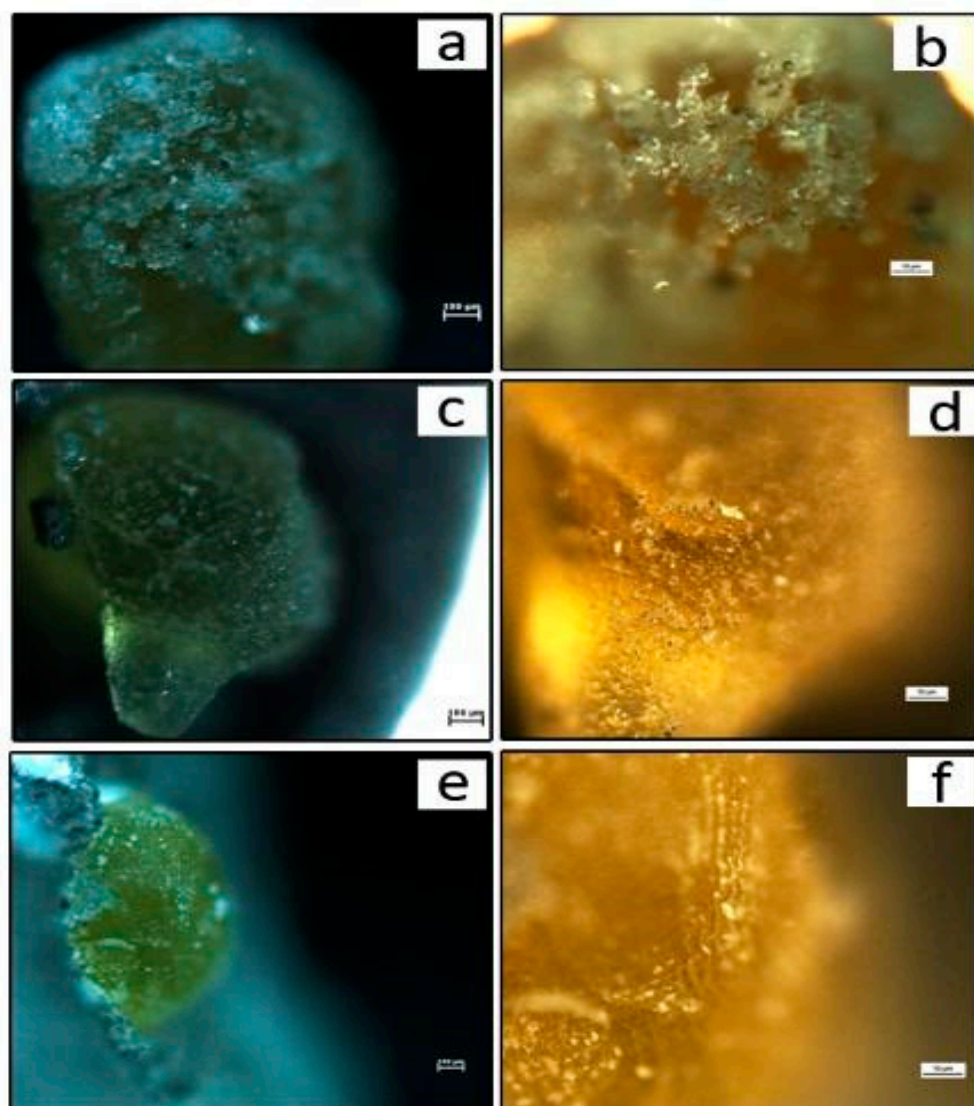

**Figure S2.** Optical microscopy images of capsules placed inside cement samples and cured for 14 days in DW. (a) NS1 capsule after 14 days inside cement  $\times 40$  magnification (b) NS1 capsule after 14 days inside cement  $\times 100$  magnification (c) N capsule after 14 days inside cement  $\times 40$  magnification (d) N capsule after 14 days inside cement  $\times 100$  magnification (e) O capsule after 14 days inside cement  $\times 40$  magnification (f) O capsule after 14 days inside cement  $\times 100$  magnification.

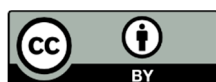

© 2020 by the authors. Licensee MDPI, Basel, Switzerland. This article is an open access article distributed under the terms and conditions of the Creative Commons Attribution (CC BY) license (<http://creativecommons.org/licenses/by/4.0/>).
